# Supplementary material for: Towards the De Novo Design of HIV-1 Protease Inhibitors Based on Natural Products
Source: MDPI journal article supplement (doi:10.3390/biom11121805), 2021-12-01
Supplement: s1 [file s1]

## Supplementary material

# Towards the de novo Design of HIV-1 Protease Inhibitors based on Natural Products

Ana L. Chávez-Hernández, K. Eurídice Juárez-Mercado, Fernanda I. Saldívar-González, and José L. Medina-Franco

### Contents

|                  | Page                                                                                                                                                                                                                                                                                                       |
|------------------|------------------------------------------------------------------------------------------------------------------------------------------------------------------------------------------------------------------------------------------------------------------------------------------------------------|
| <b>Figure S1</b> | Convex hull area from PCA based on physicochemical properties of new chemical compounds generated and two compound reference libraries. S2                                                                                                                                                                 |
| <b>Table S1</b>  | Summary of fingerprint-based structural diversity of new chemical compounds generated from COCONUT, ChemDiv, and Enamine fragments, and two compound reference libraries. S3                                                                                                                               |
| <b>Figure S2</b> | Box-whisker plots of physicochemical properties of FDA-approved drugs (blue), FDA-Approved HIV-1 protease inhibitors (purple), and new chemical compounds generated from COCONUT (orange), ChemDiv (red), and Enamine (green) fragment libraries, before applying physicochemical properties filtering. S4 |
| <b>Table S2</b>  | Summary of the descriptive statistics of SlogP. S5                                                                                                                                                                                                                                                         |
| <b>Table S3</b>  | Summary of the descriptive statistics of MW. S5                                                                                                                                                                                                                                                            |
| <b>Table S4</b>  | Summary of the descriptive statistics of RB. S5                                                                                                                                                                                                                                                            |
| <b>Table S5</b>  | Summary of the descriptive statistics of TPSA. S6                                                                                                                                                                                                                                                          |
| <b>Table S6</b>  | Summary of the descriptive statistics of HBA. S6                                                                                                                                                                                                                                                           |
| <b>Table S7</b>  | Summary of the descriptive statistics of HBD. S6                                                                                                                                                                                                                                                           |
| <b>Table S8</b>  | Summary of the descriptive statistics of SAScore. S7                                                                                                                                                                                                                                                       |
| <b>Table S9</b>  | Summary of the descriptive statistics of solubility (Silicos-IT LowSw). S7                                                                                                                                                                                                                                 |
| <b>Table S10</b> | Summary of the descriptive statistics of lipophilicity (Consensus Log P). S7                                                                                                                                                                                                                               |
| <b>Table S11</b> | Summary of the descriptive statistics of HIA. S8                                                                                                                                                                                                                                                           |
| <b>Table S12</b> | Summary of the descriptive statistics of BBB permeability. S8                                                                                                                                                                                                                                              |
| <b>Table S13</b> | Percentage of compounds that are P-glycoprotein substrate, P-glycoprotein I inhibitor, and P-glycoprotein II inhibitor. S8                                                                                                                                                                                 |
| <b>Table S14</b> | Percentage of compounds that inhibit the main cytochromes, CYP1A2, CYP2C19, CYP2C9, CYP2D6, CYP3A4. S9                                                                                                                                                                                                     |
| <b>Table S15</b> | Summary of the descriptive statistics of total clearance. S9                                                                                                                                                                                                                                               |
| <b>Table S16</b> | Summary of the descriptive statistics of toxicity descriptors. S9                                                                                                                                                                                                                                          |

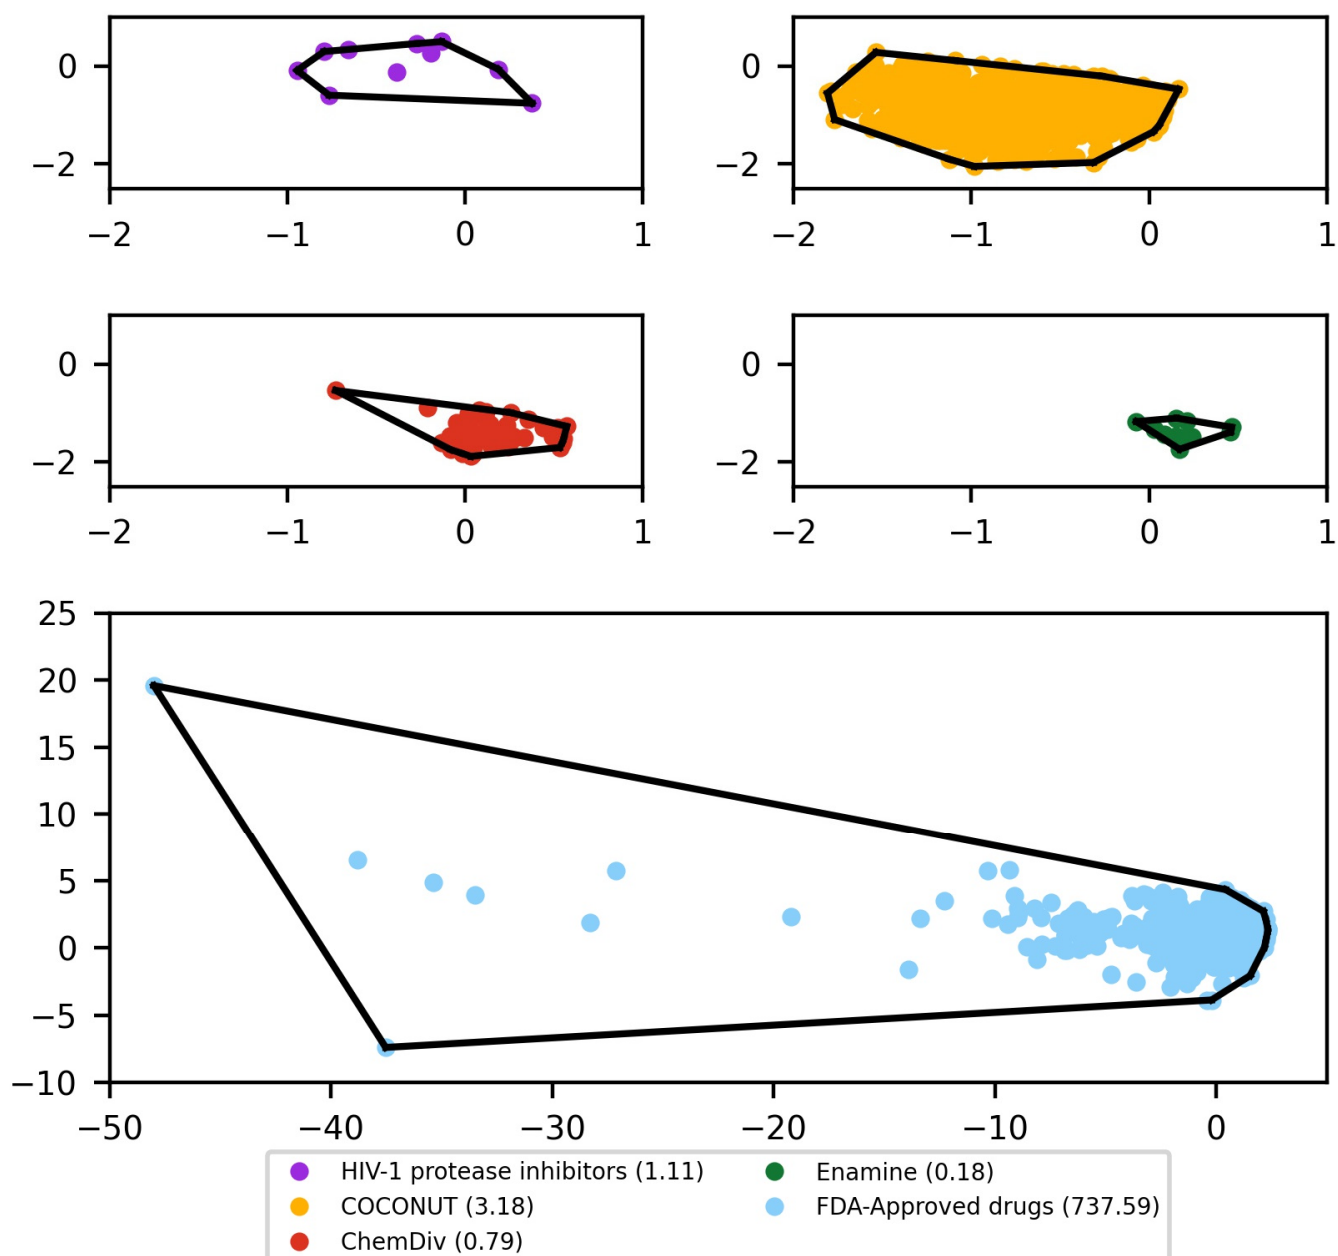

**Figure S1.** Convex hull area from PCA based on physicochemical properties of new chemical compounds generated and two compound reference libraries. Compound reference libraries represented in colors: FDA-approved drugs (blue), and FDA-approved HIV-1 protease inhibitors (purple). Likewise for new chemical compounds generated from COCONUT (orange), ChemDiv (red), and Enamine (green) fragment libraries. Convex Hull area represented in parenthesis.

**Table S1.** Summary of fingerprint-based structural diversity of new chemical compounds generated from COCONUT, ChemDiv and Enamine fragments, and two compound reference libraries, FDA-approved drugs, and FDA-approved HIV-1 protease inhibitors. <sup>a</sup>Median similarity.

| Data set                               | Morgan2 <sup>a</sup> (1024-bits) | MACCS Keys <sup>a</sup> (166-bits) |
|----------------------------------------|----------------------------------|------------------------------------|
| COCONUT                                | 0.605                            | 0.817                              |
| Enamine                                | 0.682                            | 0.823                              |
| ChemDiv                                | 0.676                            | 0.821                              |
| FDA-Approved drugs                     | 0.096                            | 0.293                              |
| FDA-Approved HIV-1 protease inhibitors | 0.253                            | 0.558                              |

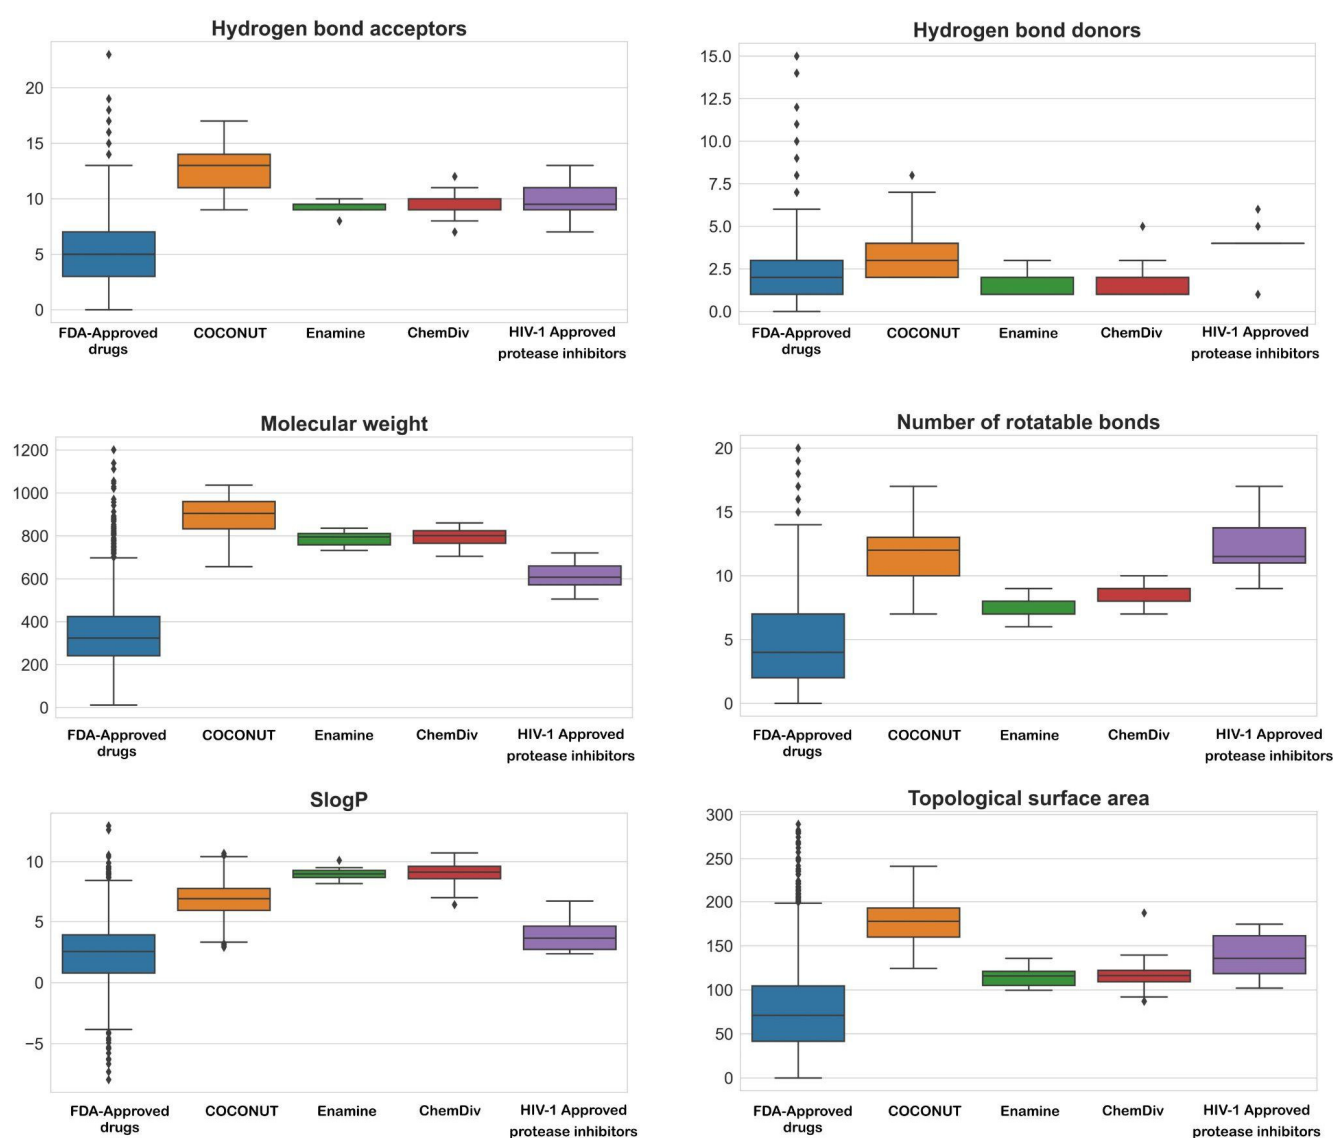

**Figure S2:** Box-whisker plots of physicochemical properties of FDA-approved drugs (blue), FDA-approved HIV-1 protease inhibitors (purple), and new chemical compounds generated from COCONUT

(orange), ChemDiv (red), and Enamine (green) fragment libraries, before applying physicochemical properties filtering.

**Table S2:** Summary of the descriptive statistics of SlogP.

| Data Set                     | Count  | Mean | Std  | Min   | 25%  | 50%  | 75%  | Max   |
|------------------------------|--------|------|------|-------|------|------|------|-------|
| COCONUT                      | 352.0  | 5.87 | 0.64 | 3.77  | 5.50 | 6.00 | 6.38 | 6.69  |
| ChemDiv                      | 1.0    | 6.40 | 0.00 | 6.40  | 6.40 | 6.40 | 6.40 | 6.40  |
| FDA-<br>Approved<br>drugs    | 2133.0 | 2.34 | 2.53 | -8.81 | 0.88 | 2.56 | 3.94 | 12.94 |
| HIV-1 protease<br>inhibitors | 10.0   | 3.93 | 1.51 | 2.38  | 2.73 | 3.65 | 4.64 | 6.70  |

**Table S3.** Summary of the descriptive statistics of MW.

| Data set                        | Count  | Mean   | Std    | Min    | 25%    | 50%    | 75%    | Max     |
|---------------------------------|--------|--------|--------|--------|--------|--------|--------|---------|
| COCONUT                         | 352.0  | 810.46 | 69.30  | 656.44 | 753.44 | 810.97 | 864.52 | 998.63  |
| ChemDiv                         | 1.0    | 737.47 | 0.00   | 737.47 | 737.47 | 737.47 | 737.47 | 737.47  |
| FDA-<br>Approved<br>drugs       | 2133.0 | 349.22 | 159.99 | 12.00  | 245.15 | 327.22 | 428.16 | 1201.84 |
| HIV-1<br>protease<br>inhibitors | 10.0   | 614.40 | 68.55  | 505.22 | 571.78 | 607.78 | 659.88 | 720.31  |

**Table S4:** Summary of the descriptive statistics of RB.

| Data set                        | Count  | Mean  | Std  | Min  | 25%  | 50%  | 75%   | Max  |
|---------------------------------|--------|-------|------|------|------|------|-------|------|
| COCONUT                         | 352.0  | 10.43 | 1.83 | 7.0  | 9.0  | 10.0 | 12.00 | 15.0 |
| ChemDiv                         | 1.0    | 10.00 | 0.00 | 10.0 | 10.0 | 10.0 | 10.00 | 10.0 |
| FDA-<br>Approved<br>drugs       | 2133.0 | 4.88  | 3.68 | 0.0  | 2.0  | 4.0  | 7.00  | 20.0 |
| HIV-1<br>protease<br>inhibitors | 10.0   | 12.40 | 2.37 | 9.0  | 11.0 | 11.5 | 13.75 | 17.0 |

**Table S5:** Summary of the descriptive statistics of TPSA.

| Data set                        | Count  | Mean   | Std   | Min    | 25%    | 50%    | 75%    | Max    |
|---------------------------------|--------|--------|-------|--------|--------|--------|--------|--------|
| COCONUT                         | 352.0  | 164.99 | 16.24 | 124.45 | 153.55 | 167.68 | 177.56 | 198.54 |
| ChemDiv                         | 1.0    | 187.47 | 0.00  | 187.47 | 187.47 | 187.47 | 187.47 | 187.47 |
| FDA-<br>Approved<br>drugs       | 2133.0 | 79.43  | 51.83 | 0.00   | 41.57  | 71.43  | 104.70 | 286.50 |
| HIV-1<br>protease<br>inhibitors | 10.0   | 137.23 | 27.21 | 101.90 | 118.52 | 135.80 | 161.51 | 174.56 |

**Table S6:** Summary of the descriptive statistics of HBA.

| Data set                        | Count  | Mean  | Std  | Min  | 25%  | 50%  | 75%  | Max  |
|---------------------------------|--------|-------|------|------|------|------|------|------|
| COCONUT                         | 352.0  | 11.64 | 1.19 | 9.0  | 11.0 | 12.0 | 13.0 | 13.0 |
| ChemDiv                         | 1.0    | 12.00 | 0.00 | 12.0 | 12.0 | 12.0 | 12.0 | 12.0 |
| FDA-<br>Approved<br>drugs       | 2133.0 | 5.57  | 3.43 | 0.0  | 3.0  | 5.0  | 7.0  | 23.0 |
| HIV-1<br>protease<br>inhibitors | 10.0   | 9.80  | 1.99 | 7.0  | 9.0  | 9.5  | 11.0 | 13.0 |

**Table S7:** Summary of the descriptive statistics of HBD.

| Data set                        | Count  | Mean | Std  | Min | 25% | 50% | 75% | Max  |
|---------------------------------|--------|------|------|-----|-----|-----|-----|------|
| COCONUT                         | 352.0  | 3.17 | 0.99 | 2.0 | 2.0 | 3.0 | 4.0 | 7.0  |
| ChemDiv                         | 1.0    | 5.00 | 0.00 | 5.0 | 5.0 | 5.0 | 5.0 | 5.0  |
| FDA-<br>Approved<br>drugs       | 2133.0 | 2.08 | 1.97 | 0.0 | 1.0 | 2.0 | 3.0 | 15.0 |
| HIV-1<br>protease<br>inhibitors | 10.0   | 4.00 | 1.25 | 1.0 | 4.0 | 4.0 | 4.0 | 6.0  |

**Table S8:** Summary of the descriptive statistics of SAScore.

| Data set                        | Count  | Mean | Std  | Min  | 25%  | 50%  | 75%  | Max  |
|---------------------------------|--------|------|------|------|------|------|------|------|
| COCONUT                         | 352.0  | 5.85 | 0.39 | 5.40 | 5.56 | 5.72 | 6.03 | 7.33 |
| ChemDiv                         | 1.0    | 5.54 | 0.00 | 5.54 | 5.54 | 5.54 | 5.54 | 5.54 |
| FDA-<br>Approved<br>drugs       | 2133.0 | 3.28 | 1.17 | 1.06 | 2.43 | 3.01 | 3.93 | 8.49 |
| HIV-1<br>protease<br>inhibitors | 10.0   | 4.03 | 0.22 | 3.48 | 3.98 | 4.06 | 4.17 | 4.24 |

**Table S9:** Summary of the descriptive statistics of solubility (Silicos-IT LowSw).

| Data set                        | Count  | Mean  | Std  | Min    | 25%   | 50%   | 75%   | Max   |
|---------------------------------|--------|-------|------|--------|-------|-------|-------|-------|
| COCONU<br>T_ChemD<br>iv         | 252.0  | -6.48 | 1.16 | -9.49  | -7.19 | -6.45 | -5.60 | -4.07 |
| FDA-<br>Approved<br>drugs       | 2243.0 | -4.38 | 3.14 | -19.66 | -6.20 | -4.34 | -2.44 | 12.92 |
| HIV-1<br>protease<br>inhibitors | 10.0   | -8.09 | 2.18 | -11.13 | -9.88 | -8.49 | -5.98 | -5.12 |

**Table S10:** Summary of the descriptive statistics of lipophilicity (Consensus Log P).

| Data set                        | Count  | Mean | Std  | Min    | 25%  | 50%  | 75%  | Max   |
|---------------------------------|--------|------|------|--------|------|------|------|-------|
| COCONU<br>T_ChemD<br>iv         | 252.0  | 4.67 | 0.61 | 3.00   | 4.28 | 4.70 | 5.10 | 5.92  |
| FDA-<br>Approved<br>drugs       | 2243.0 | 2.14 | 2.31 | -11.57 | 0.82 | 2.36 | 3.58 | 15.93 |
| HIV-1<br>protease<br>inhibitors | 10.0   | 3.58 | 1.36 | 1.45   | 2.56 | 3.50 | 4.38 | 5.90  |

**Table S11:** Summary of the descriptive statistics of HIA.

| Data set                  | Count  | Mean  | Std   | Min   | 25%   | 50%   | 75%   | Max    |
|---------------------------|--------|-------|-------|-------|-------|-------|-------|--------|
| COCONUT_ChemDiv           | 252.0  | 66.77 | 8.99  | 27.33 | 63.11 | 67.90 | 72.68 | 82.37  |
| FDA-Approved drugs        | 2208.0 | 77.33 | 26.94 | 0.00  | 69.74 | 90.60 | 94.54 | 100.00 |
| HIV-1 protease inhibitors | 9.0    | 66.27 | 9.76  | 53.06 | 62.64 | 64.42 | 65.52 | 88.32  |

**Table S12:** Summary of the descriptive statistics of BBB permeability.

| Data set                  | Count  | Mean  | Std  | Min    | 25%   | 50%   | 75%   | Max   |
|---------------------------|--------|-------|------|--------|-------|-------|-------|-------|
| COCONUT_ChemDiv           | 251.0  | -1.21 | 0.20 | -1.96  | -1.34 | -1.21 | -1.06 | -0.81 |
| FDA-Approved drugs        | 2208.0 | -0.60 | 1.34 | -33.79 | -1.12 | -0.38 | 0.10  | 1.63  |
| HIV-1 protease inhibitors | 9.0    | -1.12 | 0.39 | -1.72  | -1.36 | -1.25 | -0.75 | -0.62 |

**Table S13:** Percentage of compounds that are P-glycoprotein substrate, P-glycoprotein I inhibitor, and P-glycoprotein II inhibitor.

| Data Set                  | P-Glycoprotein Substrate | P-Glycoprotein I Inhibitor | P-Glycoprotein II Inhibitor |
|---------------------------|--------------------------|----------------------------|-----------------------------|
| COCONUT_ChemDiv           | 96.03%                   | 0.00%                      | 82.94%                      |
| FDA-Approved drugs        | 62.95%                   | 29.85%                     | 23.73%                      |
| HIV-1 protease inhibitors | 100.00%                  | 100.00%                    | 66.67%                      |

**Table S14:** Percentage of compounds that inhibit the main cytochromes, CYP1A2, CYP2C19, CYP2C9, CYP2D6, and CYP3A4.

| Data Set                  | CYP1A2 Inhibitor | CYP2C16 Inhibitor | CYP2C9 Inhibitor | CYP2D6 Inhibitor | CYP3A4 Inhibitor |
|---------------------------|------------------|-------------------|------------------|------------------|------------------|
| COCONUT_ChemDiv           | 0.00%            | 0.00%             | 0.00%            | 0.00%            | 0.00%            |
| FDA-Approved drugs        | 26.77%           | 16.58%            | 11.96%           | 16.62%           | 18.75%           |
| HIV-1 protease inhibitors | 0.00%            | 33.33%            | 33.33%           | 0.00%            | 88.89%           |

**Table S15:** Summary of the descriptive statistics of total clearance.

| Data Set                  | Count  | Mean  | Std  | Min    | 25%   | 50%   | 75%   | Max  |
|---------------------------|--------|-------|------|--------|-------|-------|-------|------|
| COCONUT_ChemDiv           | 252.0  | -0.57 | 0.28 | -1.34  | -0.77 | -0.62 | -0.34 | 0.13 |
| FDA-Approved drugs        | 2208.0 | 0.53  | 0.67 | -13.94 | 0.27  | 0.59  | 0.85  | 3.44 |
| HIV-1 protease inhibitors | 9.0    | 0.50  | 0.22 | 0.20   | 0.38  | 0.49  | 0.56  | 0.94 |

**Table S16:** Summary of the descriptive statistics of toxicity descriptors.

| Data Set                  | hERG I Inhibitor | hERG II Inhibitor | Hepatotoxicity | AMES Toxicity |
|---------------------------|------------------|-------------------|----------------|---------------|
| COCONUT_ChemDiv           | 0.00%            | 1.19%             | 72.22%         | 0.00%         |
| FDA-Approved drugs        | 2.31%            | 33.65%            | 47.42%         | 16.76%        |
| HIV-1 protease inhibitors | 0.00%            | 77.78%            | 100.00%        | 0.00%         |
